# Supplementary material for: Asymmetric Partisan Voter Turnout Games
Source: Springer Nature journal article supplement (doi:10.1007/s13235-021-00384-1), 2021-04-16
Supplement: MOESM1 [file 19078154]

**NYSVoter Enrollment by County, Party Affiliation and Status**  
**Voters Registered as of April 1, 2016**

| REGION      | COUNTY      | STATUS   | DEM    | REP    | CON   | GRE | WOR | IND    | WEP | REF | OTH | BLANK  | TOTAL   |
|-------------|-------------|----------|--------|--------|-------|-----|-----|--------|-----|-----|-----|--------|---------|
| Outside NYC | Albany      | Active   | 88,623 | 34,944 | 2,939 | 487 | 583 | 9,271  | 29  | 1   | 195 | 39,172 | 176,244 |
| Outside NYC | Albany      | Inactive | 10,730 | 2,971  | 310   | 90  | 116 | 1,119  | 1   | 0   | 107 | 5,087  | 20,531  |
| Outside NYC | Albany      | Total    | 99,353 | 37,915 | 3,249 | 577 | 699 | 10,390 | 30  | 1   | 302 | 44,259 | 196,775 |
| Outside NYC | Allegany    | Active   | 5,869  | 12,217 | 442   | 75  | 127 | 1,246  | 1   | 1   | 16  | 4,509  | 24,503  |
| Outside NYC | Allegany    | Inactive | 401    | 537    | 20    | 6   | 17  | 102    | 0   | 0   | 3   | 386    | 1,472   |
| Outside NYC | Allegany    | Total    | 6,270  | 12,754 | 462   | 81  | 144 | 1,348  | 1   | 1   | 19  | 4,895  | 25,975  |
| Outside NYC | Broome      | Active   | 40,835 | 40,667 | 1,560 | 334 | 596 | 5,949  | 18  | 4   | 87  | 20,997 | 111,047 |
| Outside NYC | Broome      | Inactive | 5,446  | 3,176  | 130   | 80  | 117 | 896    | 1   | 0   | 30  | 4,145  | 14,021  |
| Outside NYC | Broome      | Total    | 46,281 | 43,843 | 1,690 | 414 | 713 | 6,845  | 19  | 4   | 117 | 25,142 | 125,068 |
| Outside NYC | Cattaraugus | Active   | 14,573 | 17,010 | 1,109 | 114 | 281 | 2,249  | 9   | 0   | 11  | 8,884  | 44,240  |
| Outside NYC | Cattaraugus | Inactive | 1,915  | 1,811  | 129   | 22  | 66  | 402    | 0   | 0   | 9   | 1,686  | 6,040   |
| Outside NYC | Cattaraugus | Total    | 16,488 | 18,821 | 1,238 | 136 | 347 | 2,651  | 9   | 0   | 20  | 10,570 | 50,280  |
| Outside NYC | Cayuga      | Active   | 14,745 | 16,299 | 1,232 | 150 | 235 | 2,436  | 2   | 1   | 13  | 9,517  | 44,630  |
| Outside NYC | Cayuga      | Inactive | 1,341  | 1,122  | 85    | 14  | 36  | 300    | 0   | 0   | 3   | 1,091  | 3,992   |
| Outside NYC | Cayuga      | Total    | 16,086 | 17,421 | 1,317 | 164 | 271 | 2,736  | 2   | 1   | 16  | 10,608 | 48,622  |
| Outside NYC | Chautauqua  | Active   | 25,659 | 24,934 | 1,947 | 161 | 458 | 4,716  | 3   | 2   | 67  | 17,932 | 75,879  |
| Outside NYC | Chautauqua  | Inactive | 2,340  | 1,835  | 155   | 30  | 61  | 538    | 0   | 0   | 14  | 2,261  | 7,234   |
| Outside NYC | Chautauqua  | Total    | 27,999 | 26,769 | 2,102 | 191 | 519 | 5,254  | 3   | 2   | 81  | 20,193 | 83,113  |
| Outside NYC | Chemung     | Active   | 15,435 | 20,009 | 777   | 104 | 274 | 3,092  | 2   | 1   | 21  | 10,110 | 49,825  |
| Outside NYC | Chemung     | Inactive | 1,437  | 1,397  | 68    | 12  | 34  | 318    | 0   | 0   | 3   | 1,156  | 4,425   |
| Outside NYC | Chemung     | Total    | 16,872 | 21,406 | 845   | 116 | 308 | 3,410  | 2   | 1   | 24  | 11,266 | 54,250  |

**NYSVoter Enrollment by County, Party Affiliation and Status**  
**Voters Registered as of April 1, 2016**

| REGION      | COUNTY   | STATUS   | DEM     | REP     | CON    | GRE   | WOR   | IND    | WEP | REF | OTH | BLANK   | TOTAL   |
|-------------|----------|----------|---------|---------|--------|-------|-------|--------|-----|-----|-----|---------|---------|
| Outside NYC | Chenango | Active   | 7,200   | 12,269  | 495    | 133   | 179   | 1,645  | 5   | 0   | 16  | 6,335   | 28,277  |
| Outside NYC | Chenango | Inactive | 659     | 774     | 33     | 14    | 36    | 154    | 0   | 0   | 3   | 727     | 2,400   |
| Outside NYC | Chenango | Total    | 7,859   | 13,043  | 528    | 147   | 215   | 1,799  | 5   | 0   | 19  | 7,062   | 30,677  |
| Outside NYC | Clinton  | Active   | 16,842  | 14,183  | 512    | 90    | 250   | 3,225  | 3   | 0   | 0   | 10,670  | 45,775  |
| Outside NYC | Clinton  | Inactive | 1,390   | 850     | 27     | 19    | 25    | 355    | 0   | 0   | 0   | 1,216   | 3,882   |
| Outside NYC | Clinton  | Total    | 18,232  | 15,033  | 539    | 109   | 275   | 3,580  | 3   | 0   | 0   | 11,886  | 49,657  |
| Outside NYC | Columbia | Active   | 13,037  | 11,774  | 1,091  | 181   | 211   | 2,711  | 8   | 1   | 22  | 10,724  | 39,760  |
| Outside NYC | Columbia | Inactive | 1,241   | 724     | 83     | 24    | 32    | 323    | 0   | 0   | 5   | 1,007   | 3,439   |
| Outside NYC | Columbia | Total    | 14,278  | 12,498  | 1,174  | 205   | 243   | 3,034  | 8   | 1   | 27  | 11,731  | 43,199  |
| Outside NYC | Cortland | Active   | 8,448   | 9,674   | 447    | 95    | 131   | 1,535  | 3   | 0   | 5   | 6,371   | 26,709  |
| Outside NYC | Cortland | Inactive | 1,192   | 862     | 41     | 18    | 33    | 238    | 0   | 0   | 1   | 1,474   | 3,859   |
| Outside NYC | Cortland | Total    | 9,640   | 10,536  | 488    | 113   | 164   | 1,773  | 3   | 0   | 6   | 7,845   | 30,568  |
| Outside NYC | Delaware | Active   | 7,214   | 11,543  | 493    | 107   | 112   | 1,580  | 2   | 0   | 15  | 5,281   | 26,347  |
| Outside NYC | Delaware | Inactive | 716     | 715     | 34     | 9     | 16    | 160    | 0   | 0   | 3   | 632     | 2,285   |
| Outside NYC | Delaware | Total    | 7,930   | 12,258  | 527    | 116   | 128   | 1,740  | 2   | 0   | 18  | 5,913   | 28,632  |
| Outside NYC | Dutchess | Active   | 58,020  | 50,841  | 3,637  | 473   | 765   | 10,171 | 28  | 35  | 114 | 47,061  | 171,145 |
| Outside NYC | Dutchess | Inactive | 6,438   | 3,772   | 233    | 63    | 109   | 1,071  | 0   | 1   | 21  | 4,742   | 16,450  |
| Outside NYC | Dutchess | Total    | 64,458  | 54,613  | 3,870  | 536   | 874   | 11,242 | 28  | 36  | 135 | 51,803  | 187,595 |
| Outside NYC | Erie     | Active   | 276,813 | 146,502 | 13,398 | 1,558 | 2,961 | 27,821 | 50  | 9   | 460 | 100,809 | 570,381 |
| Outside NYC | Erie     | Inactive | 21,698  | 8,544   | 621    | 177   | 326   | 2,214  | 0   | 0   | 57  | 9,483   | 43,120  |
| Outside NYC | Erie     | Total    | 298,511 | 155,046 | 14,019 | 1,735 | 3,287 | 30,035 | 50  | 9   | 517 | 110,292 | 613,501 |

**NYSVoter Enrollment by County, Party Affiliation and Status**  
**Voters Registered as of April 1, 2016**

| REGION      | COUNTY   | STATUS   | DEM    | REP    | CON | GRE | WOR | IND   | WEP | REF | OTH | BLANK | TOTAL  |
|-------------|----------|----------|--------|--------|-----|-----|-----|-------|-----|-----|-----|-------|--------|
| Outside NYC | Essex    | Active   | 6,338  | 10,789 | 213 | 84  | 52  | 1,750 | 1   | 0   | 9   | 4,395 | 23,631 |
| Outside NYC | Essex    | Inactive | 717    | 944    | 24  | 17  | 20  | 279   | 0   | 0   | 6   | 669   | 2,676  |
| Outside NYC | Essex    | Total    | 7,055  | 11,733 | 237 | 101 | 72  | 2,029 | 1   | 0   | 15  | 5,064 | 26,307 |
| Outside NYC | Franklin | Active   | 9,624  | 8,457  | 343 | 59  | 94  | 1,603 | 1   | 0   | 3   | 4,662 | 24,846 |
| Outside NYC | Franklin | Inactive | 810    | 637    | 34  | 15  | 23  | 229   | 0   | 0   | 1   | 715   | 2,464  |
| Outside NYC | Franklin | Total    | 10,434 | 9,094  | 377 | 74  | 117 | 1,832 | 1   | 0   | 4   | 5,377 | 27,310 |
| Outside NYC | Fulton   | Active   | 7,667  | 15,536 | 537 | 67  | 160 | 1,657 | 4   | 2   | 6   | 5,796 | 31,432 |
| Outside NYC | Fulton   | Inactive | 424    | 550    | 23  | 10  | 14  | 105   | 0   | 0   | 0   | 423   | 1,549  |
| Outside NYC | Fulton   | Total    | 8,091  | 16,086 | 560 | 77  | 174 | 1,762 | 4   | 2   | 6   | 6,219 | 32,981 |
| Outside NYC | Genesee  | Active   | 9,065  | 15,541 | 941 | 93  | 211 | 1,879 | 1   | 0   | 64  | 8,087 | 35,882 |
| Outside NYC | Genesee  | Inactive | 498    | 628    | 40  | 9   | 15  | 125   | 0   | 0   | 6   | 517   | 1,838  |
| Outside NYC | Genesee  | Total    | 9,563  | 16,169 | 981 | 102 | 226 | 2,004 | 1   | 0   | 70  | 8,604 | 37,720 |
| Outside NYC | Greene   | Active   | 6,927  | 11,599 | 822 | 87  | 143 | 1,876 | 1   | 1   | 1   | 7,394 | 28,851 |
| Outside NYC | Greene   | Inactive | 747    | 859    | 71  | 26  | 17  | 230   | 0   | 0   | 0   | 843   | 2,793  |
| Outside NYC | Greene   | Total    | 7,674  | 12,458 | 893 | 113 | 160 | 2,106 | 1   | 1   | 1   | 8,237 | 31,644 |
| Outside NYC | Hamilton | Active   | 877    | 2,493  | 70  | 9   | 6   | 234   | 0   | 0   | 3   | 553   | 4,245  |
| Outside NYC | Hamilton | Inactive | 111    | 287    | 9   | 1   | 1   | 45    | 0   | 0   | 2   | 86    | 542    |
| Outside NYC | Hamilton | Total    | 988    | 2,780  | 79  | 10  | 7   | 279   | 0   | 0   | 5   | 639   | 4,787  |
| Outside NYC | Herkimer | Active   | 10,007 | 17,573 | 659 | 96  | 130 | 2,370 | 3   | 0   | 9   | 6,311 | 37,158 |
| Outside NYC | Herkimer | Inactive | 841    | 1,089  | 48  | 9   | 20  | 237   | 0   | 0   | 1   | 682   | 2,927  |
| Outside NYC | Herkimer | Total    | 10,848 | 18,662 | 707 | 105 | 150 | 2,607 | 3   | 0   | 10  | 6,993 | 40,085 |

**NYSVoter Enrollment by County, Party Affiliation and Status**  
**Voters Registered as of April 1, 2016**

| REGION      | COUNTY     | STATUS   | DEM     | REP     | CON    | GRE   | WOR   | IND    | WEP | REF | OTH | BLANK   | TOTAL   |
|-------------|------------|----------|---------|---------|--------|-------|-------|--------|-----|-----|-----|---------|---------|
| Outside NYC | Jefferson  | Active   | 15,118  | 22,605  | 831    | 132   | 206   | 2,991  | 3   | 0   | 23  | 11,510  | 53,419  |
| Outside NYC | Jefferson  | Inactive | 2,735   | 2,847   | 120    | 26    | 55    | 610    | 0   | 0   | 8   | 2,926   | 9,327   |
| Outside NYC | Jefferson  | Total    | 17,853  | 25,452  | 951    | 158   | 261   | 3,601  | 3   | 0   | 31  | 14,436  | 62,746  |
| Outside NYC | Lewis      | Active   | 4,203   | 8,491   | 274    | 32    | 61    | 826    | 0   | 0   | 3   | 2,715   | 16,605  |
| Outside NYC | Lewis      | Inactive | 287     | 451     | 17     | 2     | 3     | 69     | 0   | 0   | 0   | 238     | 1,067   |
| Outside NYC | Lewis      | Total    | 4,490   | 8,942   | 291    | 34    | 64    | 895    | 0   | 0   | 3   | 2,953   | 17,672  |
| Outside NYC | Livingston | Active   | 10,010  | 16,443  | 886    | 136   | 145   | 1,806  | 4   | 1   | 49  | 8,128   | 37,608  |
| Outside NYC | Livingston | Inactive | 778     | 815     | 52     | 15    | 18    | 177    | 0   | 0   | 7   | 864     | 2,726   |
| Outside NYC | Livingston | Total    | 10,788  | 17,258  | 938    | 151   | 163   | 1,983  | 4   | 1   | 56  | 8,992   | 40,334  |
| Outside NYC | Madison    | Active   | 11,051  | 15,633  | 880    | 131   | 233   | 2,594  | 3   | 0   | 37  | 9,268   | 39,830  |
| Outside NYC | Madison    | Inactive | 1,059   | 1,032   | 66     | 19    | 20    | 267    | 0   | 0   | 3   | 896     | 3,362   |
| Outside NYC | Madison    | Total    | 12,110  | 16,665  | 946    | 150   | 253   | 2,861  | 3   | 0   | 40  | 10,164  | 43,192  |
| Outside NYC | Monroe     | Active   | 173,745 | 125,888 | 8,096  | 1,189 | 1,485 | 20,157 | 31  | 4   | 481 | 104,017 | 435,093 |
| Outside NYC | Monroe     | Inactive | 16,552  | 7,271   | 449    | 135   | 200   | 1,784  | 1   | 0   | 59  | 8,873   | 35,324  |
| Outside NYC | Monroe     | Total    | 190,297 | 133,159 | 8,545  | 1,324 | 1,685 | 21,941 | 32  | 4   | 540 | 112,890 | 470,417 |
| Outside NYC | Montgomery | Active   | 9,121   | 9,408   | 659    | 60    | 120   | 1,530  | 3   | 0   | 21  | 6,142   | 27,064  |
| Outside NYC | Montgomery | Inactive | 776     | 632     | 62     | 10    | 24    | 148    | 0   | 0   | 2   | 705     | 2,359   |
| Outside NYC | Montgomery | Total    | 9,897   | 10,040  | 721    | 70    | 144   | 1,678  | 3   | 0   | 23  | 6,847   | 29,423  |
| Outside NYC | Nassau     | Active   | 369,720 | 320,719 | 10,664 | 1,535 | 2,364 | 35,351 | 103 | 14  | 303 | 222,479 | 963,252 |
| Outside NYC | Nassau     | Inactive | 13,989  | 10,563  | 345    | 76    | 78    | 1,366  | 0   | 0   | 7   | 7,741   | 34,165  |
| Outside NYC | Nassau     | Total    | 383,709 | 331,282 | 11,009 | 1,611 | 2,442 | 36,717 | 103 | 14  | 310 | 230,220 | 997,417 |

**NYSVoter Enrollment by County, Party Affiliation and Status**  
**Voters Registered as of April 1, 2016**

| REGION      | COUNTY   | STATUS   | DEM     | REP    | CON   | GRE   | WOR   | IND    | WEP | REF | OTH | BLANK  | TOTAL   |
|-------------|----------|----------|---------|--------|-------|-------|-------|--------|-----|-----|-----|--------|---------|
| Outside NYC | Niagara  | Active   | 51,767  | 42,326 | 3,120 | 427   | 1,188 | 6,520  | 14  | 29  | 90  | 22,874 | 128,355 |
| Outside NYC | Niagara  | Inactive | 1,765   | 1,119  | 75    | 21    | 50    | 215    | 0   | 0   | 3   | 1,051  | 4,299   |
| Outside NYC | Niagara  | Total    | 53,532  | 43,445 | 3,195 | 448   | 1,238 | 6,735  | 14  | 29  | 93  | 23,925 | 132,654 |
| Outside NYC | Oneida   | Active   | 43,087  | 47,378 | 2,037 | 257   | 515   | 7,360  | 11  | 2   | 72  | 23,593 | 124,312 |
| Outside NYC | Oneida   | Inactive | 4,511   | 3,811  | 184   | 39    | 83    | 1,020  | 0   | 0   | 6   | 3,211  | 12,865  |
| Outside NYC | Oneida   | Total    | 47,598  | 51,189 | 2,221 | 296   | 598   | 8,380  | 11  | 2   | 78  | 26,804 | 137,177 |
| Outside NYC | Onondaga | Active   | 99,484  | 80,943 | 4,794 | 943   | 1,253 | 14,048 | 24  | 12  | 257 | 69,380 | 271,138 |
| Outside NYC | Onondaga | Inactive | 12,561  | 5,907  | 380   | 147   | 222   | 1,751  | 1   | 0   | 41  | 8,647  | 29,657  |
| Outside NYC | Onondaga | Total    | 112,045 | 86,850 | 5,174 | 1,090 | 1,475 | 15,799 | 25  | 12  | 298 | 78,027 | 300,795 |
| Outside NYC | Ontario  | Active   | 19,460  | 26,075 | 1,376 | 219   | 213   | 3,790  | 11  | 1   | 20  | 16,068 | 67,233  |
| Outside NYC | Ontario  | Inactive | 812     | 923    | 57    | 14    | 19    | 221    | 0   | 0   | 2   | 830    | 2,878   |
| Outside NYC | Ontario  | Total    | 20,272  | 26,998 | 1,433 | 233   | 232   | 4,011  | 11  | 1   | 22  | 16,898 | 70,111  |
| Outside NYC | Orange   | Active   | 75,896  | 68,087 | 4,142 | 571   | 1,061 | 11,260 | 23  | 8   | 124 | 47,815 | 208,987 |
| Outside NYC | Orange   | Inactive | 6,196   | 4,229  | 262   | 68    | 115   | 1,012  | 0   | 0   | 11  | 4,191  | 16,084  |
| Outside NYC | Orange   | Total    | 82,092  | 72,316 | 4,404 | 639   | 1,176 | 12,272 | 23  | 8   | 135 | 52,006 | 225,071 |
| Outside NYC | Orleans  | Active   | 5,320   | 10,365 | 521   | 53    | 145   | 1,062  | 2   | 1   | 35  | 4,806  | 22,310  |
| Outside NYC | Orleans  | Inactive | 528     | 757    | 63    | 9     | 27    | 121    | 0   | 0   | 2   | 586    | 2,093   |
| Outside NYC | Orleans  | Total    | 5,848   | 11,122 | 584   | 62    | 172   | 1,183  | 2   | 1   | 37  | 5,392  | 24,403  |
| Outside NYC | Oswego   | Active   | 17,037  | 31,121 | 1,643 | 143   | 340   | 3,685  | 6   | 3   | 39  | 14,213 | 68,230  |
| Outside NYC | Oswego   | Inactive | 1,759   | 2,101  | 141   | 20    | 63    | 446    | 0   | 0   | 8   | 1,769  | 6,307   |
| Outside NYC | Oswego   | Total    | 18,796  | 33,222 | 1,784 | 163   | 403   | 4,131  | 6   | 3   | 47  | 15,982 | 74,537  |

**NYSVoter Enrollment by County, Party Affiliation and Status**  
**Voters Registered as of April 1, 2016**

| REGION      | COUNTY      | STATUS   | DEM    | REP    | CON   | GRE | WOR   | IND   | WEP | REF | OTH | BLANK  | TOTAL   |
|-------------|-------------|----------|--------|--------|-------|-----|-------|-------|-----|-----|-----|--------|---------|
| Outside NYC | Otsego      | Active   | 10,386 | 12,864 | 517   | 139 | 141   | 2,100 | 5   | 2   | 36  | 7,081  | 33,271  |
| Outside NYC | Otsego      | Inactive | 1,033  | 806    | 46    | 12  | 18    | 240   | 0   | 0   | 3   | 901    | 3,059   |
| Outside NYC | Otsego      | Total    | 11,419 | 13,670 | 563   | 151 | 159   | 2,340 | 5   | 2   | 39  | 7,982  | 36,330  |
| Outside NYC | Putnam      | Active   | 17,758 | 21,193 | 1,934 | 137 | 208   | 3,586 | 5   | 11  | 40  | 15,419 | 60,291  |
| Outside NYC | Putnam      | Inactive | 1,474  | 1,486  | 140   | 12  | 13    | 318   | 0   | 0   | 4   | 1,329  | 4,776   |
| Outside NYC | Putnam      | Total    | 19,232 | 22,679 | 2,074 | 149 | 221   | 3,904 | 5   | 11  | 44  | 16,748 | 65,067  |
| Outside NYC | Rensselaer  | Active   | 28,135 | 23,588 | 4,256 | 363 | 1,109 | 7,538 | 13  | 10  | 35  | 28,303 | 93,350  |
| Outside NYC | Rensselaer  | Inactive | 2,470  | 1,315  | 257   | 24  | 126   | 635   | 0   | 0   | 8   | 2,266  | 7,101   |
| Outside NYC | Rensselaer  | Total    | 30,605 | 24,903 | 4,513 | 387 | 1,235 | 8,173 | 13  | 10  | 43  | 30,569 | 100,451 |
| Outside NYC | Rockland    | Active   | 85,133 | 42,842 | 3,879 | 314 | 924   | 7,816 | 25  | 103 | 5   | 41,943 | 182,984 |
| Outside NYC | Rockland    | Inactive | 5,660  | 2,549  | 181   | 38  | 57    | 613   | 2   | 1   | 0   | 3,039  | 12,140  |
| Outside NYC | Rockland    | Total    | 90,793 | 45,391 | 4,060 | 352 | 981   | 8,429 | 27  | 104 | 5   | 44,982 | 195,124 |
| Outside NYC | Saratoga    | Active   | 38,026 | 58,882 | 2,311 | 373 | 422   | 8,811 | 6   | 7   | 51  | 35,325 | 144,214 |
| Outside NYC | Saratoga    | Inactive | 4,011  | 4,548  | 231   | 51  | 55    | 1,041 | 1   | 0   | 13  | 4,097  | 14,048  |
| Outside NYC | Saratoga    | Total    | 42,037 | 63,430 | 2,542 | 424 | 477   | 9,852 | 7   | 7   | 64  | 39,422 | 158,262 |
| Outside NYC | Schenectady | Active   | 34,571 | 23,245 | 3,261 | 258 | 586   | 5,358 | 19  | 1   | 67  | 21,935 | 89,301  |
| Outside NYC | Schenectady | Inactive | 3,612  | 1,653  | 189   | 34  | 95    | 540   | 0   | 0   | 11  | 2,374  | 8,508   |
| Outside NYC | Schenectady | Total    | 38,183 | 24,898 | 3,450 | 292 | 681   | 5,898 | 19  | 1   | 78  | 24,309 | 97,809  |
| Outside NYC | Schoharie   | Active   | 4,733  | 7,040  | 538   | 62  | 82    | 1,202 | 2   | 0   | 15  | 4,232  | 17,906  |
| Outside NYC | Schoharie   | Inactive | 609    | 714    | 44    | 14  | 20    | 205   | 0   | 0   | 2   | 654    | 2,262   |
| Outside NYC | Schoharie   | Total    | 5,342  | 7,754  | 582   | 76  | 102   | 1,407 | 2   | 0   | 17  | 4,886  | 20,168  |

**NYSVoter Enrollment by County, Party Affiliation and Status**  
**Voters Registered as of April 1, 2016**

| REGION      | COUNTY      | STATUS   | DEM     | REP     | CON    | GRE   | WOR   | IND    | WEP | REF | OTH | BLANK   | TOTAL   |
|-------------|-------------|----------|---------|---------|--------|-------|-------|--------|-----|-----|-----|---------|---------|
| Outside NYC | Schuyler    | Active   | 3,235   | 4,644   | 247    | 62    | 69    | 717    | 1   | 0   | 0   | 2,550   | 11,525  |
| Outside NYC | Schuyler    | Inactive | 266     | 303     | 16     | 5     | 12    | 88     | 0   | 0   | 0   | 277     | 967     |
| Outside NYC | Schuyler    | Total    | 3,501   | 4,947   | 263    | 67    | 81    | 805    | 1   | 0   | 0   | 2,827   | 12,492  |
| Outside NYC | Seneca      | Active   | 5,934   | 7,411   | 432    | 61    | 112   | 969    | 0   | 0   | 1   | 3,974   | 18,894  |
| Outside NYC | Seneca      | Inactive | 468     | 500     | 22     | 7     | 16    | 110    | 0   | 0   | 0   | 452     | 1,575   |
| Outside NYC | Seneca      | Total    | 6,402   | 7,911   | 454    | 68    | 128   | 1,079  | 0   | 0   | 1   | 4,426   | 20,469  |
| Outside NYC | St.Lawrence | Active   | 21,406  | 19,790  | 894    | 146   | 267   | 3,187  | 5   | 0   | 46  | 11,743  | 57,484  |
| Outside NYC | St.Lawrence | Inactive | 1,621   | 1,189   | 49     | 28    | 37    | 323    | 0   | 0   | 2   | 1,372   | 4,621   |
| Outside NYC | St.Lawrence | Total    | 23,027  | 20,979  | 943    | 174   | 304   | 3,510  | 5   | 0   | 48  | 13,115  | 62,105  |
| Outside NYC | Steuben     | Active   | 14,022  | 27,831  | 958    | 154   | 263   | 2,936  | 6   | 2   | 40  | 9,874   | 56,086  |
| Outside NYC | Steuben     | Inactive | 1,255   | 1,697   | 59     | 27    | 41    | 355    | 1   | 0   | 3   | 1,289   | 4,727   |
| Outside NYC | Steuben     | Total    | 15,277  | 29,528  | 1,017  | 181   | 304   | 3,291  | 7   | 2   | 43  | 11,163  | 60,813  |
| Outside NYC | Suffolk     | Active   | 303,955 | 295,671 | 22,443 | 1,800 | 4,363 | 42,905 | 82  | 13  | 593 | 249,128 | 920,953 |
| Outside NYC | Suffolk     | Inactive | 21,104  | 15,771  | 1,024  | 150   | 337   | 2,888  | 3   | 2   | 42  | 15,490  | 56,811  |
| Outside NYC | Suffolk     | Total    | 325,059 | 311,442 | 23,467 | 1,950 | 4,700 | 45,793 | 85  | 15  | 635 | 264,618 | 977,764 |
| Outside NYC | Sullivan    | Active   | 16,865  | 12,235  | 1,055  | 141   | 230   | 2,303  | 10  | 1   | 33  | 10,933  | 43,806  |
| Outside NYC | Sullivan    | Inactive | 3,316   | 1,516   | 122    | 26    | 54    | 417    | 0   | 0   | 2   | 2,009   | 7,462   |
| Outside NYC | Sullivan    | Total    | 20,181  | 13,751  | 1,177  | 167   | 284   | 2,720  | 10  | 1   | 35  | 12,942  | 51,268  |
| Outside NYC | Tioga       | Active   | 7,984   | 13,514  | 443    | 91    | 121   | 1,680  | 1   | 0   | 38  | 6,196   | 30,068  |
| Outside NYC | Tioga       | Inactive | 658     | 875     | 25     | 12    | 21    | 169    | 0   | 0   | 4   | 657     | 2,421   |
| Outside NYC | Tioga       | Total    | 8,642   | 14,389  | 468    | 103   | 142   | 1,849  | 1   | 0   | 42  | 6,853   | 32,489  |

**NYSVoter Enrollment by County, Party Affiliation and Status**  
**Voters Registered as of April 1, 2016**

| REGION      | COUNTY      | STATUS   | DEM     | REP     | CON   | GRE | WOR   | IND    | WEP | REF | OTH | BLANK   | TOTAL   |
|-------------|-------------|----------|---------|---------|-------|-----|-------|--------|-----|-----|-----|---------|---------|
| Outside NYC | Tompkins    | Active   | 25,749  | 11,623  | 394   | 456 | 217   | 2,240  | 8   | 0   | 70  | 10,730  | 51,487  |
| Outside NYC | Tompkins    | Inactive | 3,768   | 1,290   | 48    | 71  | 44    | 400    | 0   | 0   | 12  | 2,461   | 8,094   |
| Outside NYC | Tompkins    | Total    | 29,517  | 12,913  | 442   | 527 | 261   | 2,640  | 8   | 0   | 82  | 13,191  | 59,581  |
| Outside NYC | Ulster      | Active   | 39,769  | 27,580  | 2,598 | 641 | 621   | 5,762  | 12  | 1   | 91  | 33,550  | 110,625 |
| Outside NYC | Ulster      | Inactive | 3,820   | 1,934   | 165   | 75  | 74    | 544    | 1   | 0   | 17  | 3,321   | 9,951   |
| Outside NYC | Ulster      | Total    | 43,589  | 29,514  | 2,763 | 716 | 695   | 6,306  | 13  | 1   | 108 | 36,871  | 120,576 |
| Outside NYC | Warren      | Active   | 10,190  | 18,730  | 629   | 175 | 131   | 2,527  | 3   | 3   | 2   | 8,280   | 40,670  |
| Outside NYC | Warren      | Inactive | 1,066   | 1,319   | 45    | 24  | 22    | 288    | 0   | 0   | 2   | 1,074   | 3,840   |
| Outside NYC | Warren      | Total    | 11,256  | 20,049  | 674   | 199 | 153   | 2,815  | 3   | 3   | 4   | 9,354   | 44,510  |
| Outside NYC | Washington  | Active   | 8,631   | 14,555  | 671   | 122 | 189   | 2,204  | 2   | 1   | 1   | 7,321   | 33,697  |
| Outside NYC | Washington  | Inactive | 692     | 819     | 44    | 11  | 30    | 253    | 0   | 0   | 0   | 813     | 2,662   |
| Outside NYC | Washington  | Total    | 9,323   | 15,374  | 715   | 133 | 219   | 2,457  | 2   | 1   | 1   | 8,134   | 36,359  |
| Outside NYC | Wayne       | Active   | 13,057  | 21,700  | 1,518 | 131 | 269   | 2,782  | 3   | 1   | 61  | 13,502  | 53,024  |
| Outside NYC | Wayne       | Inactive | 1,011   | 1,058   | 73    | 16  | 32    | 262    | 0   | 0   | 10  | 1,145   | 3,607   |
| Outside NYC | Wayne       | Total    | 14,068  | 22,758  | 1,591 | 147 | 301   | 3,044  | 3   | 1   | 71  | 14,647  | 56,631  |
| Outside NYC | Westchester | Active   | 263,855 | 128,152 | 8,207 | 824 | 1,414 | 20,825 | 49  | 7   | 134 | 129,709 | 553,176 |
| Outside NYC | Westchester | Inactive | 26,561  | 12,200  | 690   | 92  | 197   | 2,354  | 0   | 0   | 15  | 14,297  | 56,406  |
| Outside NYC | Westchester | Total    | 290,416 | 140,352 | 8,897 | 916 | 1,611 | 23,179 | 49  | 7   | 149 | 144,006 | 609,582 |
| Outside NYC | Wyoming     | Active   | 5,319   | 10,732  | 546   | 37  | 106   | 1,180  | 0   | 0   | 9   | 5,032   | 22,961  |
| Outside NYC | Wyoming     | Inactive | 484     | 720     | 47    | 6   | 18    | 140    | 0   | 0   | 0   | 594     | 2,009   |
| Outside NYC | Wyoming     | Total    | 5,803   | 11,452  | 593   | 43  | 124   | 1,320  | 0   | 0   | 9   | 5,626   | 24,970  |

**NYSVoter Enrollment by County, Party Affiliation and Status**  
**Voters Registered as of April 1, 2016**

| REGION      | COUNTY    | STATUS   | DEM       | REP       | CON     | GRE    | WOR    | IND     | WEP | REF | OTH   | BLANK     | TOTAL     |
|-------------|-----------|----------|-----------|-----------|---------|--------|--------|---------|-----|-----|-------|-----------|-----------|
| Outside NYC | Yates     | Active   | 3,190     | 6,360     | 240     | 49     | 60     | 664     | 3   | 2   | 5     | 2,666     | 13,239    |
| Outside NYC | Yates     | Inactive | 239       | 313       | 16      | 3      | 9      | 60      | 0   | 0   | 1     | 290       | 931       |
| Outside NYC | Yates     | Total    | 3,429     | 6,673     | 256     | 52     | 69     | 724     | 3   | 2   | 6     | 2,956     | 14,170    |
| Outside NYC | Grand Tot | Active   | 2,510,740 | 2,140,518 | 131,558 | 16,921 | 29,192 | 331,288 | 672 | 298 | 4,064 | 1,558,004 | 6,723,255 |
| Outside NYC | Grand Tot | Inactive | 210,598   | 131,117   | 8,024   | 2,004  | 3,439  | 30,890  | 12  | 4   | 585   | 141,757   | 528,430   |
| Outside NYC | Grand Tot | Total    | 2,721,338 | 2,271,635 | 139,582 | 18,925 | 32,631 | 362,178 | 684 | 302 | 4,649 | 1,699,761 | 7,251,685 |
| Within NYC  | Bronx     | Active   | 491,052   | 37,190    | 2,855   | 549    | 2,634  | 12,489  | 136 | 14  | 87    | 85,653    | 632,659   |
| Within NYC  | Bronx     | Inactive | 74,076    | 5,952     | 440     | 82     | 524    | 2,197   | 9   | 0   | 21    | 15,103    | 98,404    |
| Within NYC  | Bronx     | Total    | 565,128   | 43,142    | 3,295   | 631    | 3,158  | 14,686  | 145 | 14  | 108   | 100,756   | 731,063   |
| Within NYC  | Kings     | Active   | 853,687   | 100,363   | 3,953   | 2,389  | 4,814  | 25,323  | 153 | 15  | 341   | 195,495   | 1,186,533 |
| Within NYC  | Kings     | Inactive | 91,961    | 10,290    | 443     | 341    | 693    | 3,533   | 0   | 0   | 46    | 24,743    | 132,050   |
| Within NYC  | Kings     | Total    | 945,648   | 110,653   | 4,396   | 2,730  | 5,507  | 28,856  | 153 | 15  | 387   | 220,238   | 1,318,583 |
| Within NYC  | New York  | Active   | 617,963   | 84,870    | 1,611   | 1,755  | 1,896  | 26,301  | 128 | 18  | 382   | 153,738   | 888,662   |
| Within NYC  | New York  | Inactive | 92,105    | 17,649    | 284     | 321    | 340    | 6,020   | 0   | 0   | 108   | 32,520    | 149,347   |
| Within NYC  | New York  | Total    | 710,068   | 102,519   | 1,895   | 2,076  | 2,236  | 32,321  | 128 | 18  | 490   | 186,258   | 1,038,009 |
| Within NYC  | Queens    | Active   | 675,661   | 115,703   | 5,228   | 1,426  | 3,329  | 25,672  | 143 | 14  | 221   | 205,778   | 1,033,175 |
| Within NYC  | Queens    | Inactive | 47,079    | 7,766     | 380     | 107    | 291    | 2,124   | 1   | 0   | 33    | 15,216    | 72,997    |
| Within NYC  | Queens    | Total    | 722,740   | 123,469   | 5,608   | 1,533  | 3,620  | 27,796  | 144 | 14  | 254   | 220,994   | 1,106,172 |
| Within NYC  | Richmond  | Active   | 119,328   | 76,352    | 4,359   | 354    | 1,082  | 9,099   | 29  | 14  | 91    | 53,756    | 264,464   |
| Within NYC  | Richmond  | Inactive | 8,247     | 3,918     | 220     | 22     | 110    | 630     | 0   | 0   | 7     | 3,712     | 16,866    |
| Within NYC  | Richmond  | Total    | 127,575   | 80,270    | 4,579   | 376    | 1,192  | 9,729   | 29  | 14  | 98    | 57,468    | 281,330   |

**NYSVoter Enrollment by County, Party Affiliation and Status**  
**Voters Registered as of April 1, 2016**

| REGION           | COUNTY | STATUS   | DEM       | REP       | CON     | GRE    | WOR    | IND     | WEP   | REF | OTH   | BLANK     | TOTAL      |
|------------------|--------|----------|-----------|-----------|---------|--------|--------|---------|-------|-----|-------|-----------|------------|
| Within NYC Total |        | Active   | 2,757,691 | 414,478   | 18,006  | 6,473  | 13,755 | 98,884  | 589   | 75  | 1,122 | 694,420   | 4,005,493  |
| Within NYC Total |        | Inactive | 313,468   | 45,575    | 1,767   | 873    | 1,958  | 14,504  | 10    | 0   | 215   | 91,294    | 469,664    |
| Within NYC Total |        | Total    | 3,071,159 | 460,053   | 19,773  | 7,346  | 15,713 | 113,388 | 599   | 75  | 1,337 | 785,714   | 4,475,157  |
| Statewide Total  |        | Active   | 5,268,431 | 2,554,996 | 149,564 | 23,394 | 42,947 | 430,172 | 1,261 | 373 | 5,186 | 2,252,424 | 10,728,748 |
| Statewide Total  |        | Inactive | 524,066   | 176,692   | 9,791   | 2,877  | 5,397  | 45,394  | 22    | 4   | 800   | 233,051   | 998,094    |
| Statewide Total  |        | Total    | 5,792,497 | 2,731,688 | 159,355 | 26,271 | 48,344 | 475,566 | 1,283 | 377 | 5,986 | 2,485,475 | 11,726,842 |
